# Supplementary material for: A BEAT-PCD consensus statement: a core outcome set for pulmonary disease interventions in primary ciliary dyskinesia
Source: PubMed Central journal article supplement — ERJ Open Res. 2024 Jan 8;10(1):00115-2023. doi: 10.1183/23120541.00115-2023 (PMC10772902; doi:10.1183/23120541.00115-2023), 2024-01-08
Supplement: 00115-2023.SUPPLEMENT.pdf [file 00115-2023.SUPPLEMENT.pdf]

# A BEAT-PCD consensus statement: a core outcome set for pulmonary disease interventions in primary ciliary dyskinesia

Renate Kos<sup>1</sup>, Myrofora Goutaki<sup>2,3</sup>, Helene E. Kobbernagel<sup>4</sup>, Bruna Rubbo<sup>6,7</sup>, Amelia Shoemark<sup>8</sup>, Stefano Aliberti<sup>9,10</sup>, Josje Altenburg<sup>1</sup>, Pinelopi Anagnostopoulou<sup>11</sup>, Rodrigo A. Athanazio<sup>12</sup>, Nicole Beydon<sup>12,13</sup>, Sharon D. Dell<sup>14,15</sup>, Nagehan Emiralioglu<sup>16</sup>, Thomas W. Ferkol<sup>17</sup>, Michael R. Loebinger<sup>18,19</sup>, Natalie Lorent<sup>20</sup>, Bernard Maître<sup>21</sup>, June Marthin<sup>4</sup>, Lucy C. Morgan<sup>22</sup>, Kim G. Nielsen<sup>4,5</sup>, Felix C. Ringshausen<sup>23,24</sup>, Michal Shteinberg<sup>25,26</sup>, Harm A.W.M. Tiddens<sup>27,28,29</sup>, Anke H. Maitland-Van der Zee<sup>1,30</sup>, James D. Chalmers<sup>8</sup>, Jane S.A. Lucas<sup>31,32</sup>, Eric G. Haarman<sup>30</sup>

1. Dept. of Pulmonary Medicine, Amsterdam University Medical Centres – loc. AMC, University of Amsterdam - Amsterdam (Netherlands)
2. Institute of Social and Preventive Medicine, University of Bern, Switzerland
3. Paediatric Respiratory Medicine, Children's University Hospital of Bern, University of Bern, Switzerland
4. Danish Primary Ciliary Dyskinesia Centre, Paediatric Pulmonary Service, Dept of Paediatrics and Adolescent Medicine, Copenhagen University Hospital, Rigshospitalet, Copenhagen, Denmark
5. Department of Clinical Medicine, University of Copenhagen, Copenhagen, Denmark
6. School of Health Sciences, University of Southampton, Southampton, United Kingdom
7. Department of Population and Public Health Sciences, Keck School of Medicine, University of Southern California
8. Division of Molecular and Clinical Medicine, School of Medicine, University of Dundee, Dundee, United Kingdom
9. Department of Biomedical Sciences, Humanitas University, Via Rita Levi Montalcini 4, Pieve Emanuele, Milan, 20072, Italy
10. IRCCS Humanitas Research Hospital, Respiratory Unit, Via Manzoni 56, Rozzano, Milan, 20089, Italy
11. Medical School, University of Cyprus, Nicosia, Cyprus
12. Pulmonary Division, Heart Institute (InCor) Hospital das Clínicas, Faculdade de Medicina da Universidade de São Paulo, Brazil Sorbonne Université, INSERM U938, Paris, France
13. Unité d'Exploration Fonctionnelle Respiratoire, Hôpital Armand-Trousseau, Paris, France
14. Department of Paediatrics, Faculty of Medicine, University of British Columbia, Vancouver, Canada
15. Pediatric Respiratory Medicine, Provincial Health Services Authority, BC Children's Hospital, Vancouver, Canada

16. Dept of Pediatric Pulmonology, Hacettepe University Faculty of Medicine, Ankara, Turkey
17. Dept of Pediatrics, University of North Carolina School of Medicine and Marsico Lung Institute, Chapel Hill, North Carolina, United States
18. Royal Brompton and Harefield Hospitals, London, United Kingdom
19. National Heart and Lung Institute, Imperial College London, London, United Kingdom
20. Dept of Pediatrics, University Hospital Leuven, Leuven, Belgium
21. Service de Pneumologie, Hôpital Henri Mondor et Centre Hospitalier Intercommunal de Créteil, Assistance Publique-Hôpitaux de Paris (AP-HP), Créteil, France
22. Department of Microbiology and Infectious Diseases, Concord Repatriation and General Hospital, NSW Health Pathology, Sydney, Australia
23. Department of Respiratory Medicine, Hannover Medical School (MHH), Biomedical Research in End-Stage and Obstructive Lung Disease Hannover (BREATH), German Center for Lung Research (DZL), Hannover, Germany
24. European Reference Network for Rare and Complex Lung Diseases (ERN-LUNG), Frankfurt am Main, Germany
25. Rappaport Faculty of Medicine, Technion – Israel Institute of Technology, Haifa, Israel
26. Pulmonology Institute and CF Center, Carmel Medical Center, Haifa, Israel
27. Department of Pediatric Pulmonology and Allergology, Erasmus MC Sophia Children's Hospital, Rotterdam, Netherlands
28. Department of Radiology, Erasmus MC Sophia Children's Hospital, Rotterdam, Netherlands
29. Thirona, Nijmegen, Netherlands
30. Dept. of Paediatric Respiratory Medicine and Allergy, Emma Children's Hospital, Amsterdam University Medical Centres - Amsterdam (Netherlands)
31. University of Southampton, Faculty of Medicine, School of Clinical and Experimental Sciences, Southampton, SO17 1BJ, United Kingdom
32. Primary Ciliary Dyskinesia Centre, University Hospital Southampton NHS Foundation Trust, Southampton, SO16 6YD, United Kingdom

# SUPPLEMENT

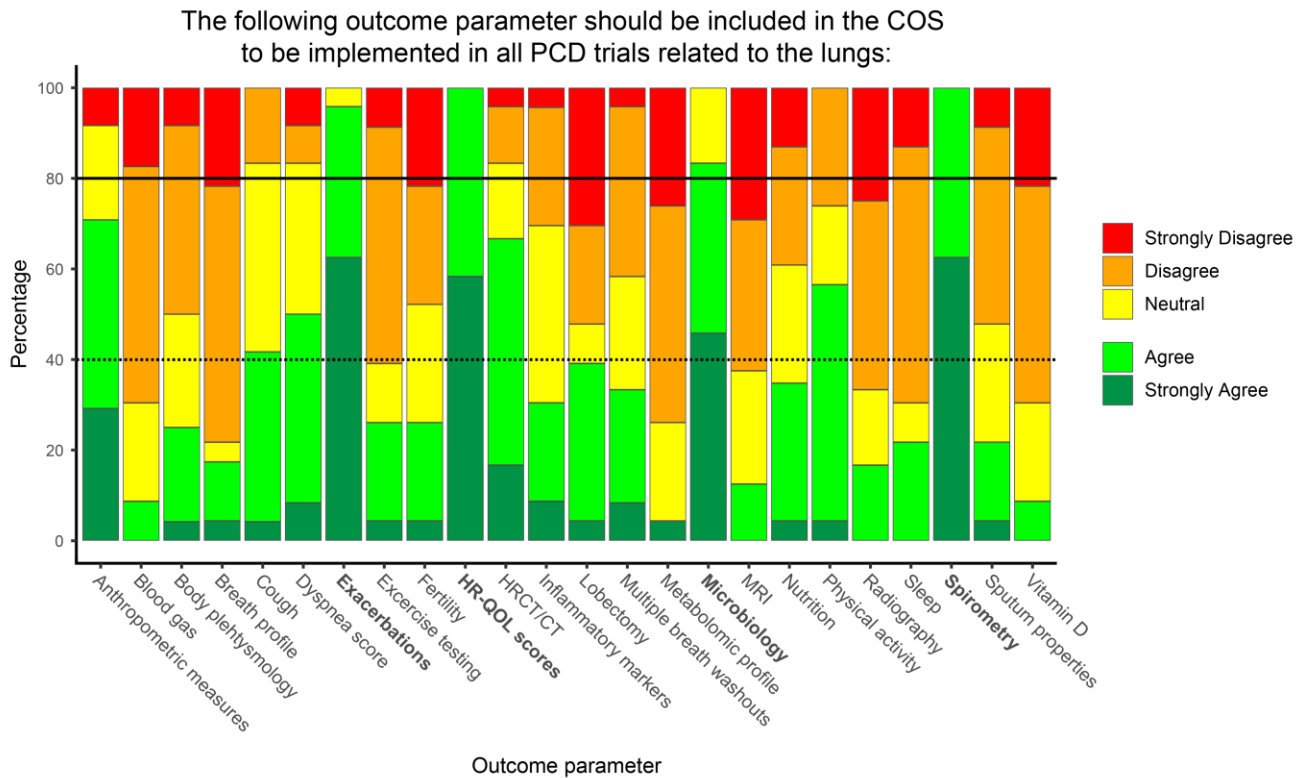

Suppl. Figure 1 Results on agreement on whether an outcome parameter should be included in the core outcome set, from round one. Consensus demanded an 80% agreement (black line); including both the answer options 'agree' and 'strongly agree'. Outcome parameters that reached consensus are indicated in **bold**. Outcome parameters that scored below 40% agreement (dotted line) were dropped from subsequent rounds. COS: core outcome set. HRCT/CT: High-resolution computed tomography; HR-QOL: Health related quality of life; MRI: Magnetic Resonance Imaging
